# Supplementary material for: Hollow MoS2/Co nanopillars with boosted Li-ion diffusion rate and long-term cycling stability
Source: Royal Society of Chemistry journal article supplement (doi:10.1039/d1cc04292k), 2021-01-01
Supplement: d1cc04292k1.pdf [file d1cc04292k1.pdf]

## Electronic Supplementary Information:

Hollow MoS<sub>2</sub>/Co nanopillars with boosted Li-ion diffusion rate and long-term cycling stability

Xunlu Wang <sup>ab</sup>, Ruguang Ma <sup>\*ac</sup> Minmin Wang,<sup>d</sup> Jin Wang,<sup>d</sup> Tongming Sun,<sup>d</sup> Lanping Hu,<sup>d</sup> Jinli Zhu,<sup>d</sup> Yanfeng Tan,<sup>d</sup> and Jiacheng Wang <sup>\*ab</sup>

<sup>a</sup>. State Key Laboratory of High-Performance Ceramics and Superfine Microstructure, Shanghai Institute of Ceramics, Chinese Academy of Sciences, 1295 Dingxi Road, Shanghai 200050, China.

E-mail: jiacheng.wang@mail.sic.ac.cn; maruguang@mail.sic.ac.cn.

<sup>b</sup>. Center of Materials Science and Optoelectronics Engineering, University of Chinese Academy of Sciences, 100049 Beijing, China

Email: jiacheng.wang@mail.sic.ac.cn;

<sup>c</sup>. School of Materials Science and Engineering, Suzhou University of Science and Technology, 99 Xuefu Road Suzhou, 215011, China

Email: ruguangma@usts.edu.cn

<sup>d</sup>. College of Chemistry and Chemical Engineering, Nantong University, Nantong 226019, China

## **1. Experimental section**

### **1.1. Preparation of hollow MoS<sub>2</sub>/Co-0.1 nanopillars**

All chemicals were analytical reagents and used directly without purification. First, we synthesized the CoMoO<sub>4</sub> nanorods as precursor via hydrothermal method at 140°C for 6 h in 30 mL of deionized water containing 3 mmol nickel (II) nitrate hexahydrate and 3 mmol ammonium molybdate tetrahydrate as shown in Fig. S1. Then, when the as-synthesized CoMoO<sub>4</sub> nanorods were sulfured with sulfur powder in a H<sub>2</sub>/Ar (v/v, 5/95) atmosphere at 550 °C for 2 h, the inner Mo atoms diffused outward and formed MoS<sub>2</sub>. As a result, MoS<sub>2</sub> nanosheets were grown directly on Co nanorods as shown in Fig. S2, which was named as MoS<sub>2</sub>/Co-1 (the atomic ratio of Co and Mo is 0.92, Fig. S4). Finally, the hollow structured MoS<sub>2</sub>/Co-0.1 was obtained by etching with suitable sulfuric acid (H<sub>2</sub>SO<sub>4</sub>). The hollow structured MoS<sub>2</sub>/Co-0.01 was synthesized by etching with excessive sulfuric acid (H<sub>2</sub>SO<sub>4</sub>).

### **1.2. Characterization**

The structure and morphology of the obtained samples were characterized by powder XRD (D8 ADVANCE, Cu K $\alpha$  radiation), SEM (FEI Magellan 400), TEM, and HRTEM (JEM-2100F). The chemical composition of the products was analyzed by XPS measurements (ESCALAB) using Al K $\alpha$  (h $\nu$  = 1486.6 eV) radiation. Raman spectra were recorded by a DXR Raman Microscope (Thermal Scientific Co., USA) with 532 nm excitation length.

### **1.3. Electrochemical measurements**

Electrochemical performances of the MoS<sub>2</sub>/Co-based electrodes were tested by 2016-type coin cells packaged in an argon-filled glovebox. A mixed slurry (active materials: acetylene black: PVDF binder = 8:1:1 in weight) was coated onto clean copper foil and dried in a vacuum oven for 12 h to obtain the working electrode. The typical mass loading of the active materials was about 1.0  $\pm$  0.2 mg cm<sup>-2</sup>. The working electrodes were assembled into a half-cell using Li metal as counter electrode. The electrolyte was 1 M LiPF<sub>6</sub> dissolved in the mixed solution containing ethyl carbonate (EC) and diethyl

carbonate (DEC) (1:1; v/v) and the separator was Whatman Glass Microfiber Filters. Galvanostatic discharge/charge curves were tested in the NEWARE battery testing system within the voltage range of 0.1-3.0 V (vs. Li/Li<sup>+</sup>). EIS tests and CVs were conducted with an electrochemical workstation (CHI 760E). Finally, GITT tests were carried out in the NEWARE battery testing system with current density of 0.3 A g<sup>-1</sup>, which was periodically interrupted every 5 min, with a 30 min rest period.

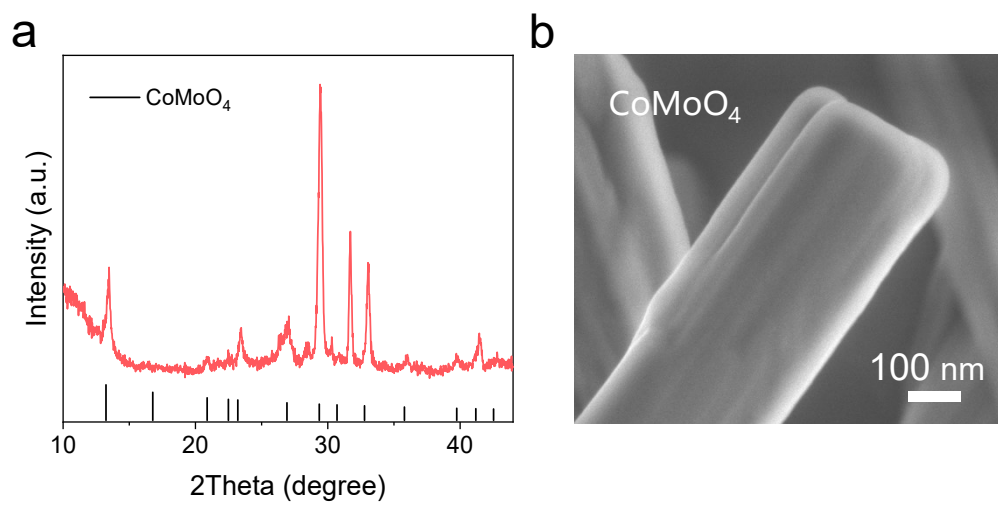

**Fig. S1** a) XRD pattern, and b) SEM image of CoMoO<sub>4</sub>.



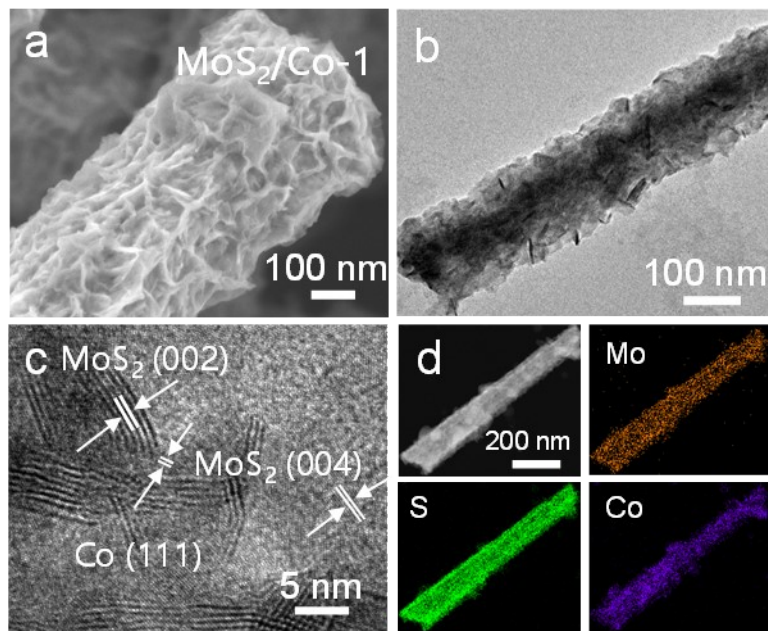

**Fig. S2** a) SEM image, b) TEM image, c) HRTEM image, d) HAADF-STEM image and corresponding elemental mapping images of MoS<sub>2</sub>/Co-1.

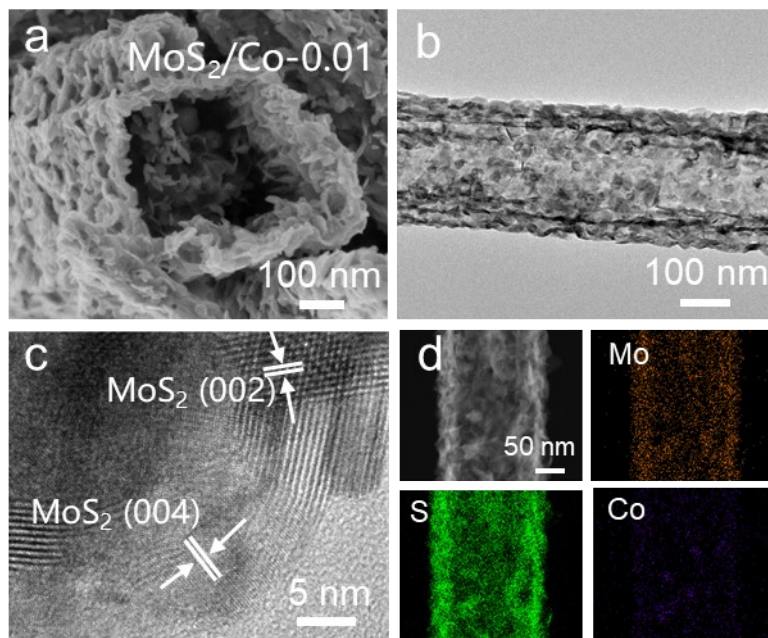

**Fig. S3** a) SEM image, b) TEM image, c) HRTEM image, d) HAADF-STEM image and corresponding elemental mapping images of MoS<sub>2</sub>/Co-0.01.

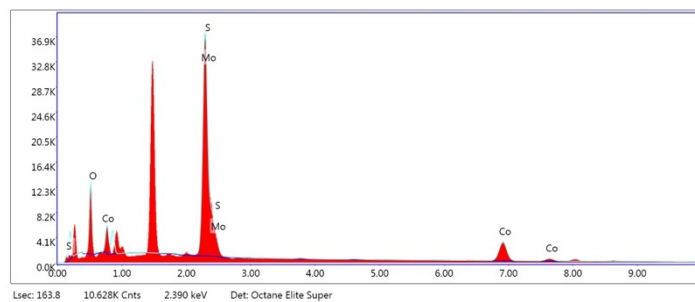

**Fig. S4** EDX analysis of the MoS<sub>2</sub>/Co-1.

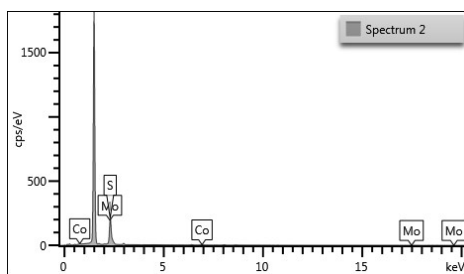

**Fig. S5** EDX analyses of the MoS<sub>2</sub>/Co-0.1.

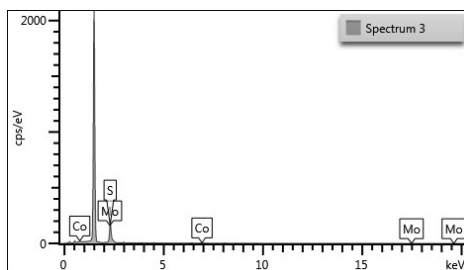

**Fig. S6** EDX analyses of the MoS<sub>2</sub>/Co-0.01.

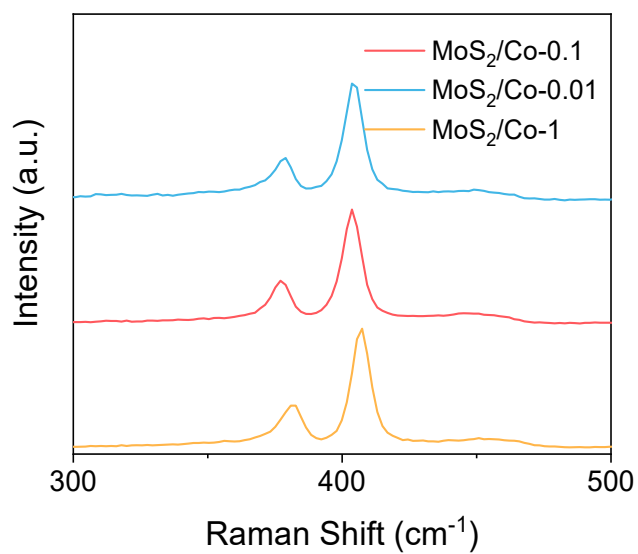

**Fig. S7** Raman spectra of MoS<sub>2</sub>/Co-0.1, MoS<sub>2</sub>/Co-0.01 and MoS<sub>2</sub>/Co-1.

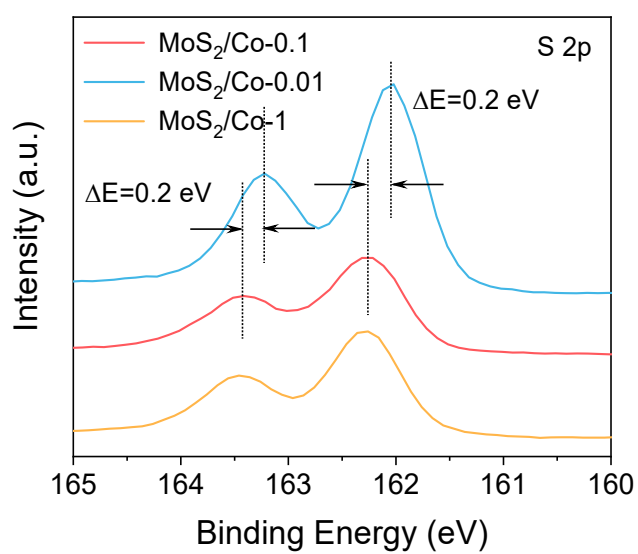

**Fig. S8** S 2p XPS spectra of MoS<sub>2</sub>/Co-0.1, MoS<sub>2</sub>/Co-0.01 and MoS<sub>2</sub>/Co-1.

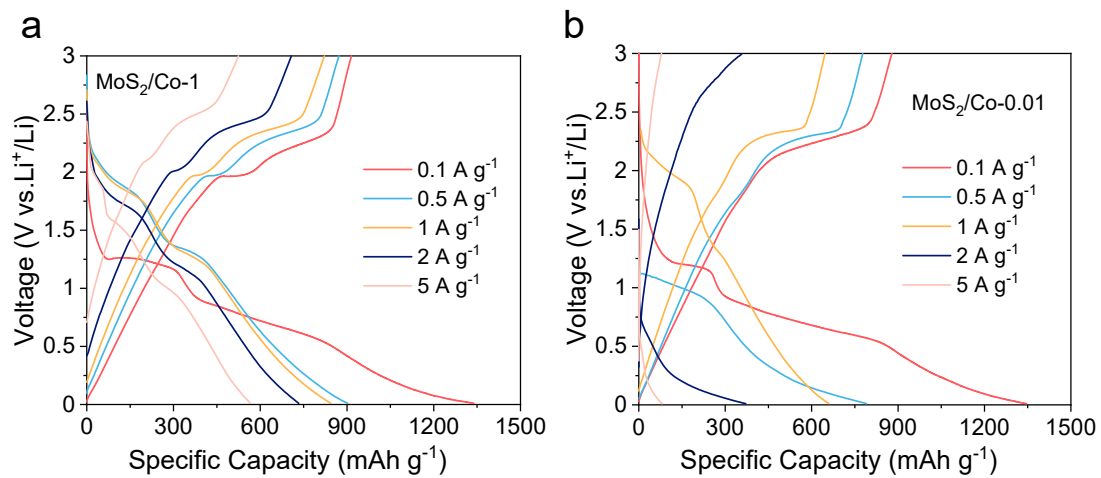

**Fig. S9** Charge/discharge curves of a) MoS<sub>2</sub>/Co-1 and b) MoS<sub>2</sub>/Co-0.01 at different current densities.

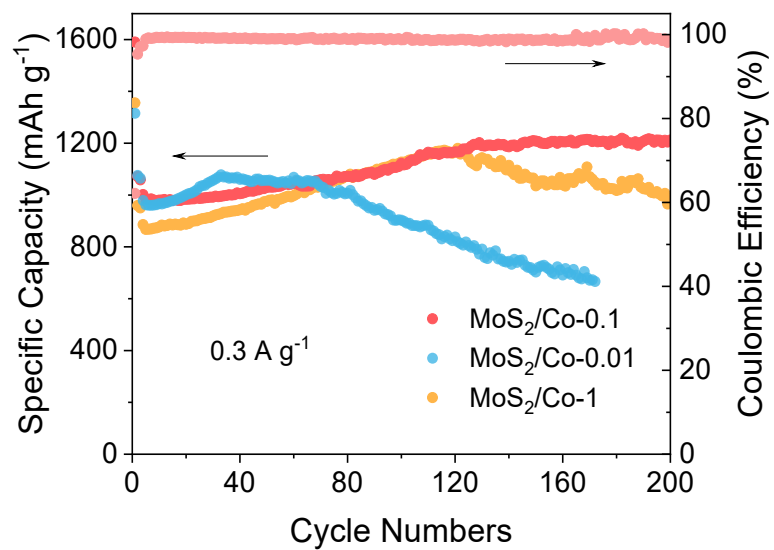

**Fig. S10** Cycling performance at a current density of  $0.3 \text{ A g}^{-1}$  for the  $\text{MoS}_2/\text{Co-0.1}$ ,  $\text{MoS}_2/\text{Co-0.01}$  and  $\text{MoS}_2/\text{Co-1}$  electrodes.

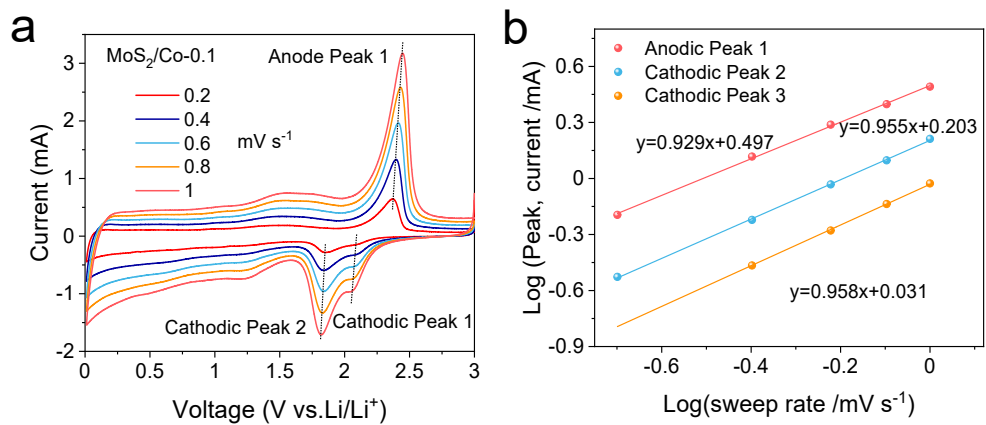

**Fig. S11** a) CV curves measured at different scan rates from 0.2 to 1 mV s<sup>-1</sup>, b) *b* value according to the relationship of log(*i*) and log(*v*) at different peaks for MoS<sub>2</sub>/Co-0.1.

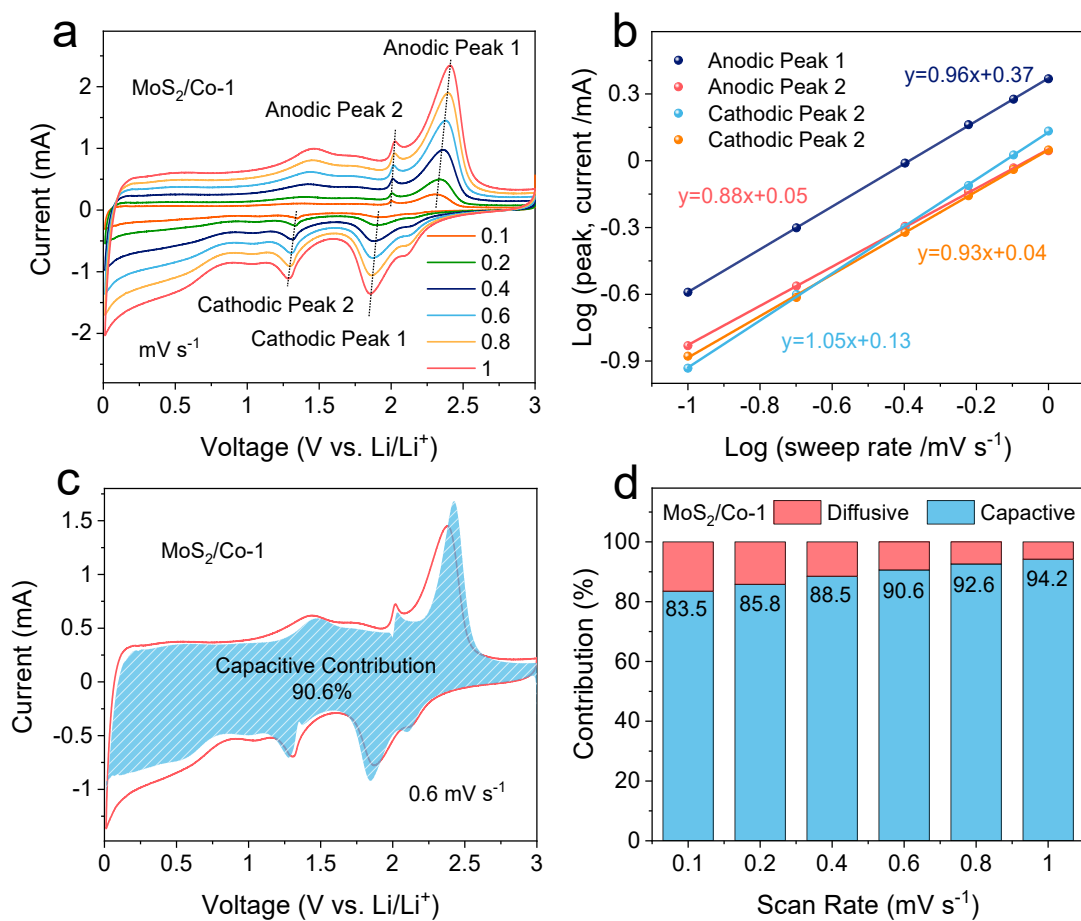

**Fig. S12** a) CV curves measured at different scan rates from 0.2 to 1 mV s<sup>-1</sup>, b) *b* value according to the relationship of log(*i*) and log(*v*) at different peaks, c) pseudocapacitive contribution (shaded area) at the scan rate of 0.6 mV s<sup>-1</sup> and d) the ratio of pseudocapacitive contribution at different scan rates for MoS<sub>2</sub>/Co-1.



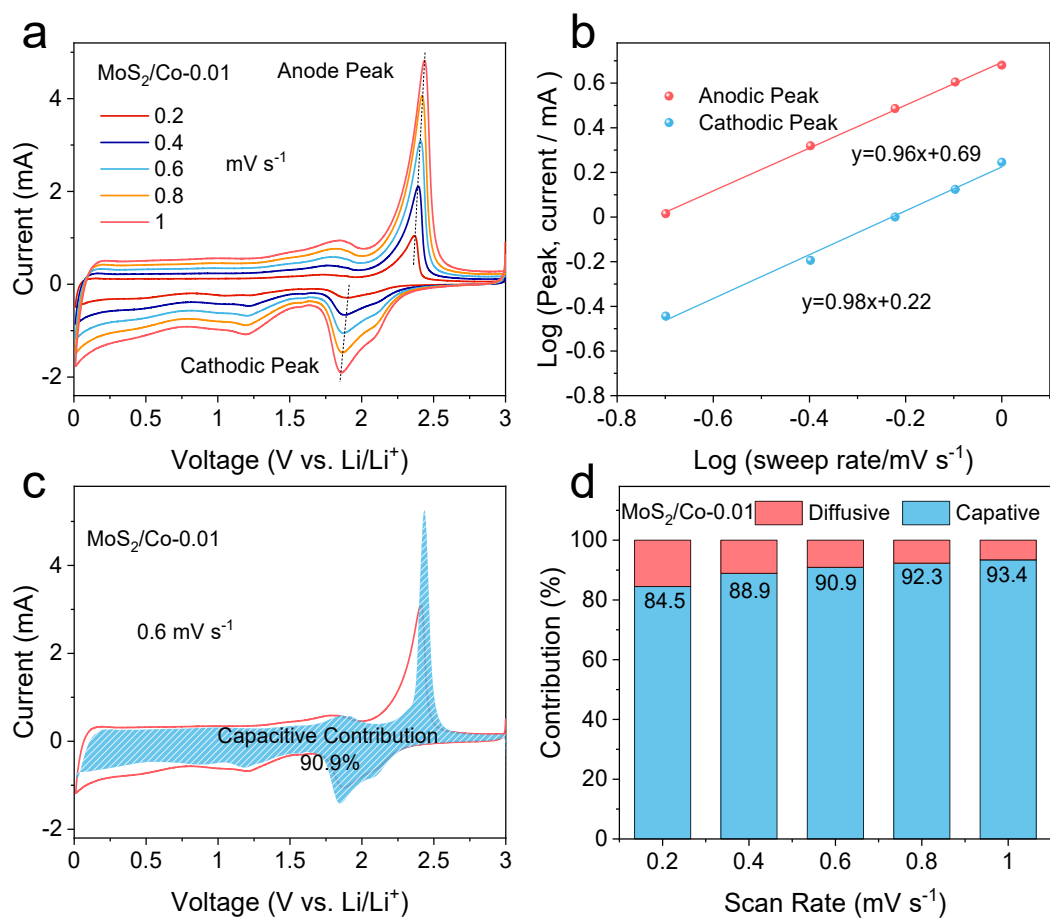

**Fig. S13.** a) CV curves measured at different scan rates from 0.2 to 1 mV s<sup>-1</sup>, b) *b* value according to the relationship of log(*i*) and log(*v*) at different peaks, c) pseudocapacitive contribution (shaded area) at the scan rate of 0.6 mV s<sup>-1</sup> and d) the ratio of pseudocapacitive contribution at different scan rates for MoS<sub>2</sub>/Co-0.01.

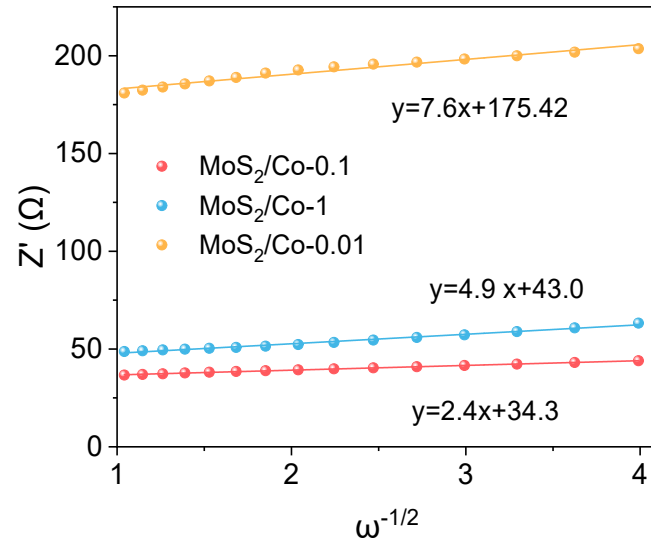

**Fig. S14** Relationship between the real part of the impedance and  $\omega^{-1/2}$  MoS<sub>2</sub>/Co-0.1, MoS<sub>2</sub>/Co-1 and MoS<sub>2</sub>/Co-0.01.

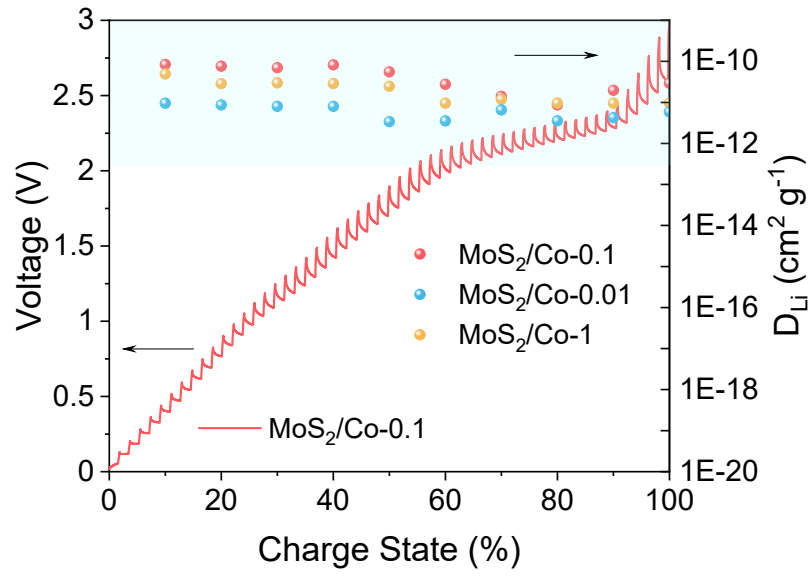

**Fig. S15** Charge profiles of MoS<sub>2</sub>/Co-0.1, MoS<sub>2</sub>/Co-1 and MoS<sub>2</sub>/Co-0.01 electrodes in GITT test and the Li<sup>+</sup> diffusivity coefficient.

**Table S1.** The atomic ratio of Co and Mo in MoS<sub>2</sub>/Co-0.1, MoS<sub>2</sub>/Co-1 and MoS<sub>2</sub>/Co-0.01.

| Sample                    | Co/Mo |
|---------------------------|-------|
| MoS <sub>2</sub> /Co-1    | 0.92  |
| MoS <sub>2</sub> /Co-0.1  | 0.1   |
| MoS <sub>2</sub> /Co-0.01 | 0.01  |

**Table S2.** The R<sub>ct</sub> values at different temperatures of MoS<sub>2</sub>/Co-0.1 and MoS<sub>2</sub>/Co-0.01, respectively.

| Sample                    | R <sub>ct</sub> 10 °C (Ω) | R <sub>ct</sub> 20 °C (Ω) | R <sub>ct</sub> 30 °C (Ω) | R <sub>ct</sub> 40 °C (Ω) |
|---------------------------|---------------------------|---------------------------|---------------------------|---------------------------|
| MoS <sub>2</sub> /Co-0.1  | 12.8                      | 7.5                       | 4.8                       | 3.5                       |
| MoS <sub>2</sub> /Co-0.01 | 181                       | 101.8                     | 68                        | 35.9                      |

**Table S3.** Tables of specific atomic content in MoS<sub>2</sub>/Co-x

|                           | Co    | Mo    | S     |
|---------------------------|-------|-------|-------|
| MoS <sub>2</sub> /Co-1    | 21.11 | 23.16 | 55.73 |
| MoS <sub>2</sub> /Co-0.1  | 3.19  | 32.02 | 64.79 |
| MoS <sub>2</sub> /Co-0.01 | 0.38  | 33.7  | 65.92 |

**Table S4.** Statistics of MoS<sub>2</sub>-based anode materials electrochemical measurements.

| Sample                                | Current density<br>(mA g <sup>-1</sup> ) | Cycle<br>number | Capacity retention<br>(mAh g <sup>-1</sup> ) | Ref. |
|---------------------------------------|------------------------------------------|-----------------|----------------------------------------------|------|
| MoS <sub>2</sub> nanosheet            | 400                                      | 500             | 1023                                         | 3    |
| V4C3-<br>MXene/MoS <sub>2</sub> /C    | 1000                                     | 450             | 662                                          | 4    |
| 1T-MoS <sub>2</sub> /C                | 1000                                     | 300             | 870                                          | 5    |
| MoS <sub>2</sub><br>-on-MXene         | 1000                                     | 100             | 580                                          | 6    |
| MoS <sub>2</sub><br>HollowNanospheres | 500                                      | 100             | 1100                                         | 7    |
| MoS <sub>2</sub> @N-CF<br>nanosheets  | 1000                                     | 110             | 844                                          | 8    |
| MoS <sub>2</sub> /NC-PNR              | 2000                                     | 700             | 520                                          | 9    |
